# Supplementary material for: Synergistic effect between In2O3 and ZrO2 in the reverse water gas shift reaction
Source: Royal Society of Chemistry journal article supplement (doi:10.1039/d4ra01372g), 2024-01-01
Supplement: d4ra01372g1.pdf [file d4ra01372g1.pdf]

## Supplementary Information

### **Synergistic effect between $\text{In}_2\text{O}_3$ and $\text{ZrO}_2$ in reverse water gas shift reaction**

**Jiayu Dong<sup>a</sup>, Hong Wang<sup>c</sup>, Guofeng Zhao<sup>b,\*</sup>, Dong Jiang<sup>a,\*</sup>, Haitao Xu<sup>a,\*</sup>**

<sup>a</sup>School of Chemical Engineering, East China University of Science and Technology, Shanghai 200237, China

<sup>a</sup>School of Chemistry and Molecular Engineering, East China University of Science and Technology, Shanghai 200237, China

<sup>b</sup>Key Laboratory of Functional Molecular Solids, Ministry of Education, College of Chemistry and Materials Science, Anhui Normal University, Wuhu 241002, China

<sup>c</sup>Institute of Optical Functional Materials for Biomedical Imaging, School of Chemistry and Pharmaceutical Engineering, Shandong First Medical University & Shandong Academy of Medical Sciences, Taian 271016, China

\*Corresponding authors. E-mail addresses: [gfzhao@chem.ecnu.edu.cn](mailto:gfzhao@chem.ecnu.edu.cn) (G. Zhao); [jiangdong@ecust.edu.cn](mailto:jiangdong@ecust.edu.cn) (D. Jiang); [xuhaitao@ecust.edu.cn](mailto:xuhaitao@ecust.edu.cn) (H. Xu)

**Table S1** Metal contents and textural properties of In<sub>2</sub>O<sub>3</sub>-ZrO<sub>2</sub> catalysts

| Catalyst                                             | In <sub>2</sub> O <sub>3</sub> content <sup>a</sup> | ZrO <sub>2</sub> content <sup>a</sup> | Porous properties <sup>b</sup>                         |                           |
|------------------------------------------------------|-----------------------------------------------------|---------------------------------------|--------------------------------------------------------|---------------------------|
|                                                      | Measured<br>(mol %)                                 | Measured<br>(mol %)                   | S <sub>BET</sub><br>(m <sup>2</sup> ·g <sup>-1</sup> ) | D <sub>pore</sub><br>(nm) |
| 100In <sub>2</sub> O <sub>3</sub> -0ZrO <sub>2</sub> | 100                                                 | 0                                     | 55                                                     | 38                        |
| 75In <sub>2</sub> O <sub>3</sub> -25ZrO <sub>2</sub> | 73.6                                                | 26.4                                  | 60                                                     | 25                        |
| 50In <sub>2</sub> O <sub>3</sub> -50ZrO <sub>2</sub> | 47.6                                                | 52.4                                  | 71                                                     | 15                        |
| 25In <sub>2</sub> O <sub>3</sub> -75ZrO <sub>2</sub> | 23.9                                                | 76.2                                  | 68                                                     | 7                         |
| 0In <sub>2</sub> O <sub>3</sub> -100ZrO <sub>2</sub> | 0                                                   | 100                                   | 55                                                     | 10                        |

<sup>a</sup>Determined by ICP.

<sup>b</sup>Measured by N<sub>2</sub> desorption.

**Table S2** Particle sizes and O<sub>v</sub> contents of In<sub>2</sub>O<sub>3</sub>-ZrO<sub>2</sub> catalysts

| Catalyst                                             | D (nm) <sup>a</sup> | O <sub>v</sub> content <sup>b</sup> |
|------------------------------------------------------|---------------------|-------------------------------------|
| 100In <sub>2</sub> O <sub>3</sub> -0ZrO <sub>2</sub> | 15                  | -                                   |
| 75In <sub>2</sub> O <sub>3</sub> -25ZrO <sub>2</sub> | 11                  | 39.8%                               |
| 50In <sub>2</sub> O <sub>3</sub> -50ZrO <sub>2</sub> | 10                  | 17.4%                               |
| 25In <sub>2</sub> O <sub>3</sub> -75ZrO <sub>2</sub> | 11                  | 6.5%                                |
| 0In <sub>2</sub> O <sub>3</sub> -100ZrO <sub>2</sub> | 11                  | -                                   |

<sup>a</sup>Calculated by In<sub>2</sub>O<sub>3</sub>(222) or ZrO<sub>2</sub>(111) peaks using Scherrer equation.

<sup>b</sup>Measured by XPS.

**Table S3** Comparison of catalysts used in RWGS reaction

| Catalyst                                             | T(°C) | P(MPa) | H <sub>2</sub> /CO <sub>2</sub> | X <sub>CO<sub>2</sub></sub> (%) | S <sub>CO</sub> (%) | STY   | Ref          |
|------------------------------------------------------|-------|--------|---------------------------------|---------------------------------|---------------------|-------|--------------|
| In <sub>2</sub> O <sub>3</sub> -CeO <sub>2</sub>     | 400   | 0.1    | 1:1                             | 5.34                            | 100                 | 0.77  | 1            |
| Cu <sub>5</sub> In <sub>5</sub> /CeO <sub>2</sub>    | 400   | 0.1    | 4:1                             | 20                              | 100                 | 0.54  | 2            |
| Cu <sub>5</sub> In <sub>5</sub> /ZrO <sub>2</sub>    | 400   | 0.1    | 4:1                             | <5                              | 100                 | <0.14 | 2            |
| Ni/ZrO <sub>2</sub> -80                              | 400   | 0.1    | 4:1                             | <10                             | 100                 | 0.41  | 3            |
| Cs-Fe <sub>x</sub> C-co                              | 400   | 0.1    | 4:1                             | 36                              | 59                  | 0.76  | 4            |
| 10%Cu-<br>5%Fe/CeO <sub>2</sub>                      | 450   | 0.1    | 1:1                             | 25                              | 100                 | 0.18  | 5            |
| Cu-Ni/ $\gamma$ -Al <sub>2</sub> O <sub>3</sub>      | 500   | 0.1    | 1:1                             | 23.2                            | 75.5                | 0.11  | 6            |
| Au/ZrO <sub>2</sub>                                  | 350   | 0.3    | 3:1                             | ~6                              | 100                 | 0.09  | 7            |
| Au/Al <sub>2</sub> O <sub>3</sub>                    | 350   | 0.1    | 5:1                             | 20                              | >99                 | 0.24  | 8            |
| Ag/Al <sub>2</sub> O <sub>3</sub>                    | 600   | 0.1    | 3:1                             | 14                              | 100                 | 0.8   | 9            |
| 75In <sub>2</sub> O <sub>3</sub> -25ZrO <sub>2</sub> | 400   | 0.1    | 3:1                             | 28                              | 96                  | 0.81  | this<br>work |

**Table S4** Assignment of absorbance peaks observed in the *in-situ* FTIR

| Surface species       |                                  | Vibration mode                     | Frequency (cm <sup>-1</sup> )<br>Wavenumber (cm <sup>-1</sup> ) | Ref       |
|-----------------------|----------------------------------|------------------------------------|-----------------------------------------------------------------|-----------|
| Bidentate formate     | bi-HCOO*                         | v <sub>as</sub> (CH)               | 2969                                                            | 10        |
|                       |                                  |                                    | 2965                                                            | 11        |
|                       |                                  |                                    | 2969                                                            | 12        |
|                       |                                  | v <sub>s</sub> (CH)                | 2869                                                            | 10        |
|                       |                                  |                                    | 2872                                                            | 11        |
|                       |                                  |                                    | 2876                                                            | 12        |
|                       |                                  |                                    | 1561-1581                                                       | 11, 13-18 |
|                       |                                  | v <sub>as</sub> (OCO)              | 1583                                                            | 19        |
|                       |                                  |                                    | 1585                                                            | 10        |
|                       |                                  |                                    | 1588                                                            | 12        |
|                       |                                  |                                    | 1346                                                            | 11        |
| 1356-1359             | 16, 18                           |                                    |                                                                 |           |
| Monodentate formate   | m-HCOO*                          | v <sub>s</sub> (OCO)               | 1255                                                            | 20        |
|                       |                                  |                                    | 1285                                                            | 12        |
|                       |                                  |                                    | 1295                                                            | 19        |
|                       |                                  |                                    | 1298                                                            | 14        |
| Bridged methoxy       | b-*OCH <sub>3</sub>              | v <sub>as</sub> (CH <sub>3</sub> ) | 2931                                                            | 10        |
|                       |                                  |                                    | 2926                                                            | 16        |
|                       |                                  |                                    | 2928                                                            | 12        |
|                       |                                  | v <sub>s</sub> (CH <sub>3</sub> )  | 2836                                                            | 10        |
|                       |                                  |                                    | 2820                                                            | 16        |
|                       |                                  |                                    | 2825                                                            | 12        |
|                       |                                  |                                    | v(CO)                                                           | 1140-1150 |
| Bidentate bicarbonate | bi-HCO <sub>3</sub>              | v <sub>as</sub> (CO <sub>3</sub> ) | 1620                                                            | 21        |
|                       |                                  |                                    | 1630                                                            | 14        |
|                       |                                  |                                    | 1636-1650                                                       | 22        |
|                       |                                  | δ(OH)                              | 1225                                                            | 14, 21    |
|                       |                                  | 1225-1236                          | 22                                                              |           |
| Monodentate carbonate | m-CO <sub>3</sub> <sup>2-</sup>  | v <sub>as</sub> (CO <sub>3</sub> ) | 1355                                                            | 21        |
|                       |                                  |                                    | 1368                                                            | 22        |
| Bidentate carbonate   | bi-CO <sub>3</sub> <sup>2-</sup> | v <sub>as</sub> (CO <sub>3</sub> ) | 1555                                                            | 21        |
|                       |                                  |                                    | 1563                                                            | 23        |
| Polydentate carbonate | p-CO <sub>3</sub> <sup>2-</sup>  | v <sub>as</sub> (CO <sub>3</sub> ) | 1460                                                            | 14        |
|                       |                                  |                                    | 1474                                                            | 13        |
|                       |                                  | v <sub>s</sub> (CO <sub>3</sub> )  | 1405                                                            | 23        |
|                       |                                  |                                    | 1406                                                            | 14        |
| Carbon monoxide       | CO                               |                                    | 2077, 2130                                                      | 23        |
|                       |                                  |                                    | 2115                                                            | 10        |
|                       |                                  |                                    | 2129                                                            | 19        |
| Methane               | CH <sub>4</sub>                  |                                    | 3016                                                            | 24, 25    |

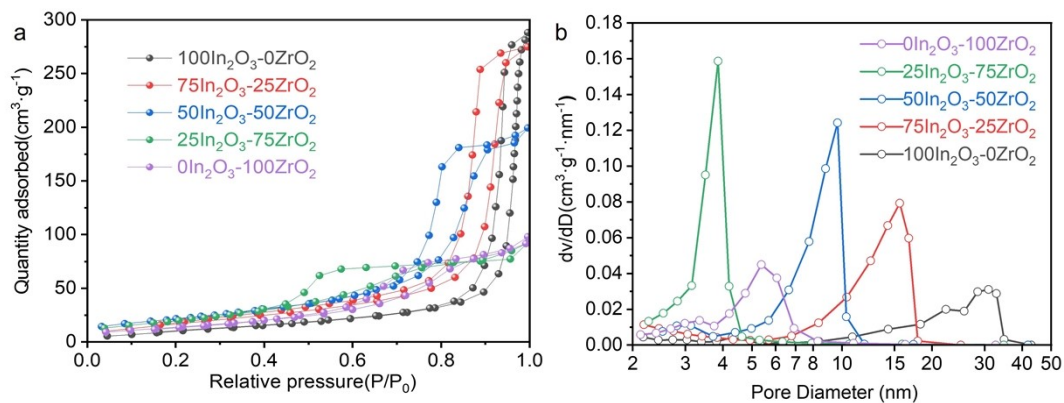

**Figure S1** (a) N<sub>2</sub> adsorption-desorption isothermal curves and (b) pore size distribution of In<sub>2</sub>O<sub>3</sub>-ZrO<sub>2</sub> catalysts.

The N<sub>2</sub> adsorption and desorption curves of all catalysts belong to IV adsorption isotherms, which indicates the mesoporous structure (Fig. S1a). Fig. S1b. shows the pore diameter distribution of the catalysts. As can be observed, all catalysts exhibit maxima in the mesoporous region.

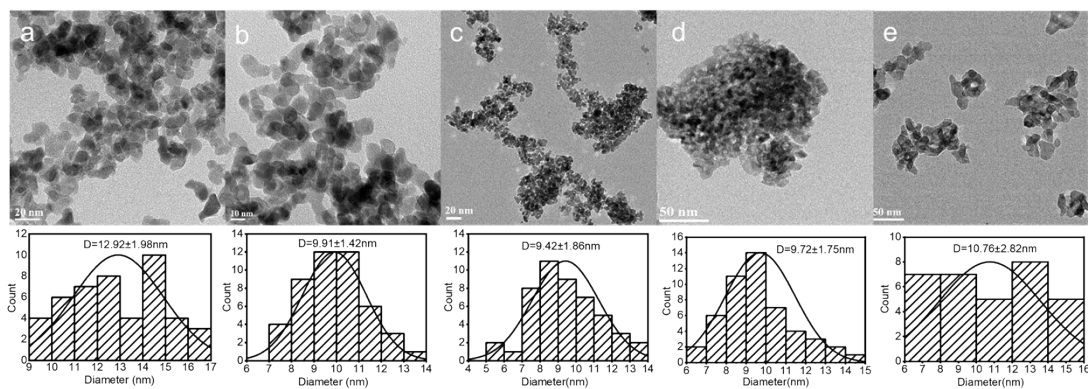

**Figure S2** TEM images and particle size distributions of (a) 100In<sub>2</sub>O<sub>3</sub>-0ZrO<sub>2</sub>, (b) 75In<sub>2</sub>O<sub>3</sub>-25ZrO<sub>2</sub>, (c) 50In<sub>2</sub>O<sub>3</sub>-50ZrO<sub>2</sub>, (d) 25In<sub>2</sub>O<sub>3</sub>-75ZrO<sub>2</sub>, and (e) 0In<sub>2</sub>O<sub>3</sub>-100ZrO<sub>2</sub> catalysts.

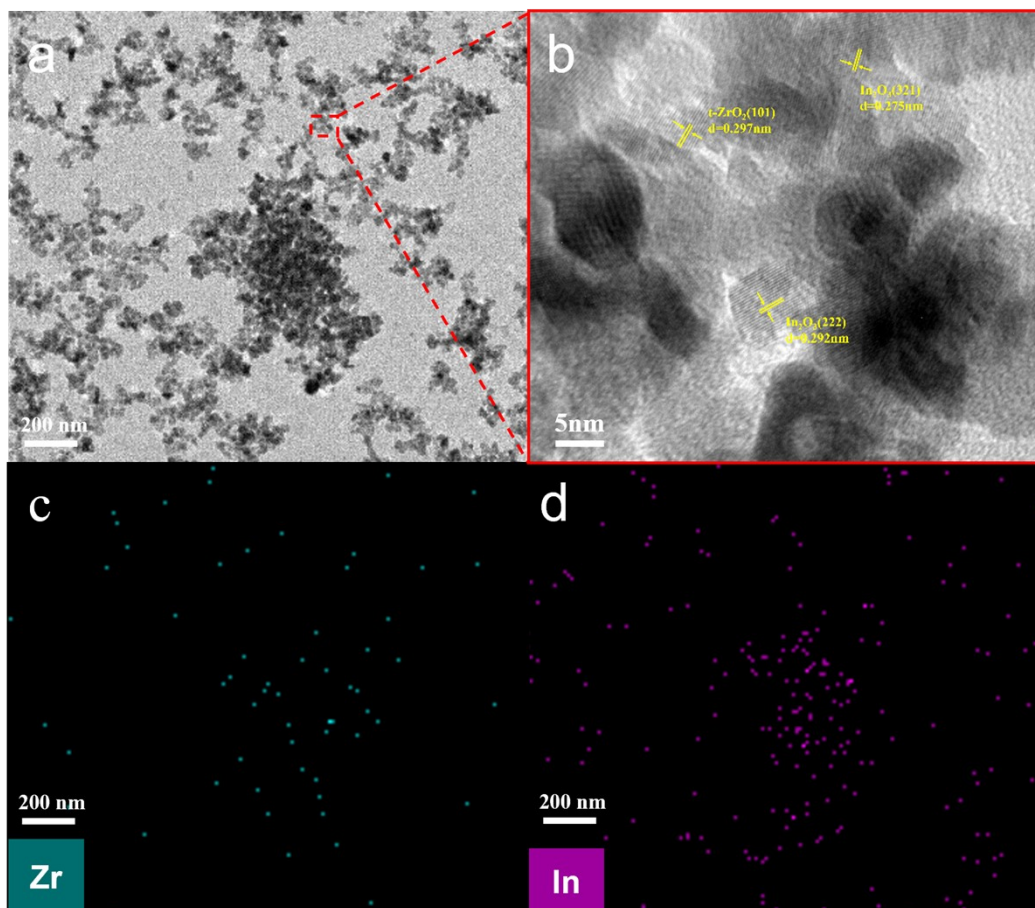

**Figure S3** (a) HAADF-STEM image, (b) high-resolution TEM image and (c, d) corresponding energy-dispersive X-ray (EDX) elemental mappings of 75In<sub>2</sub>O<sub>3</sub>-25ZrO<sub>2</sub> catalyst.



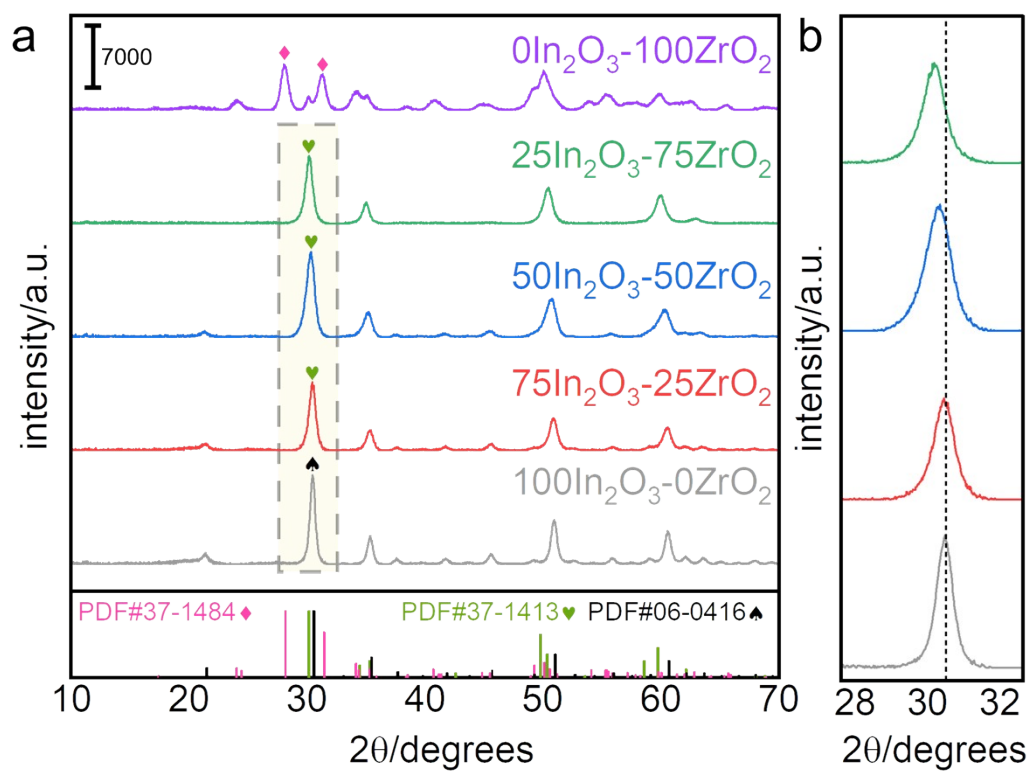

**Figure S4** (a) XRD patterns and (b) enlarged parts ( $28$ - $32^\circ$ ) of  $\text{In}_2\text{O}_3$ - $\text{ZrO}_2$  catalysts.

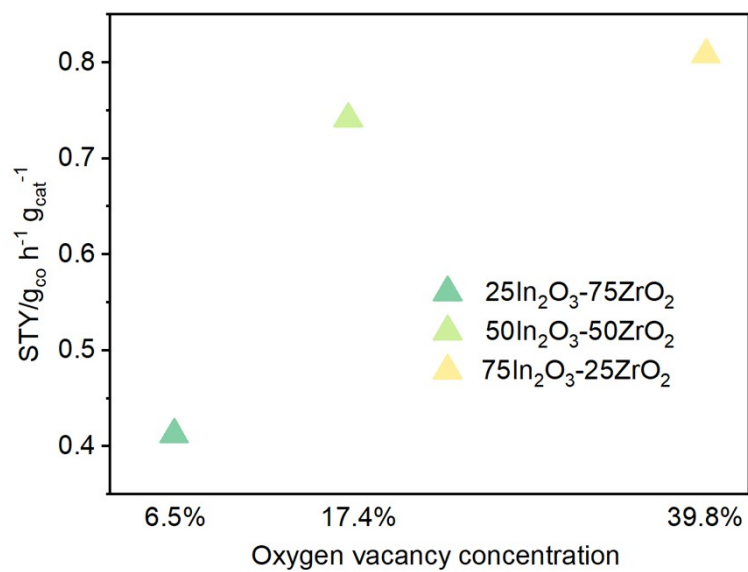

**Figure S5** The relationship diagram of CO STY and oxygen vacancy concentration of In<sub>2</sub>O<sub>3</sub>-ZrO<sub>2</sub> catalysts.

As shown in Fig. S5, the oxygen vacancy concentration of 25In<sub>2</sub>O<sub>3</sub>-75ZrO<sub>2</sub>, 50In<sub>2</sub>O<sub>3</sub>-50ZrO<sub>2</sub> and 75In<sub>2</sub>O<sub>3</sub>-25ZrO<sub>2</sub> is 6.5%, 17.4% and 39.8%, respectively. And the corresponding STY (space-time yield) is 0.4, 0.7 and 0.8, respectively. The STY of the In<sub>2</sub>O<sub>3</sub>-ZrO<sub>2</sub> catalyst has a positive correlation with the oxygen vacancy concentration.

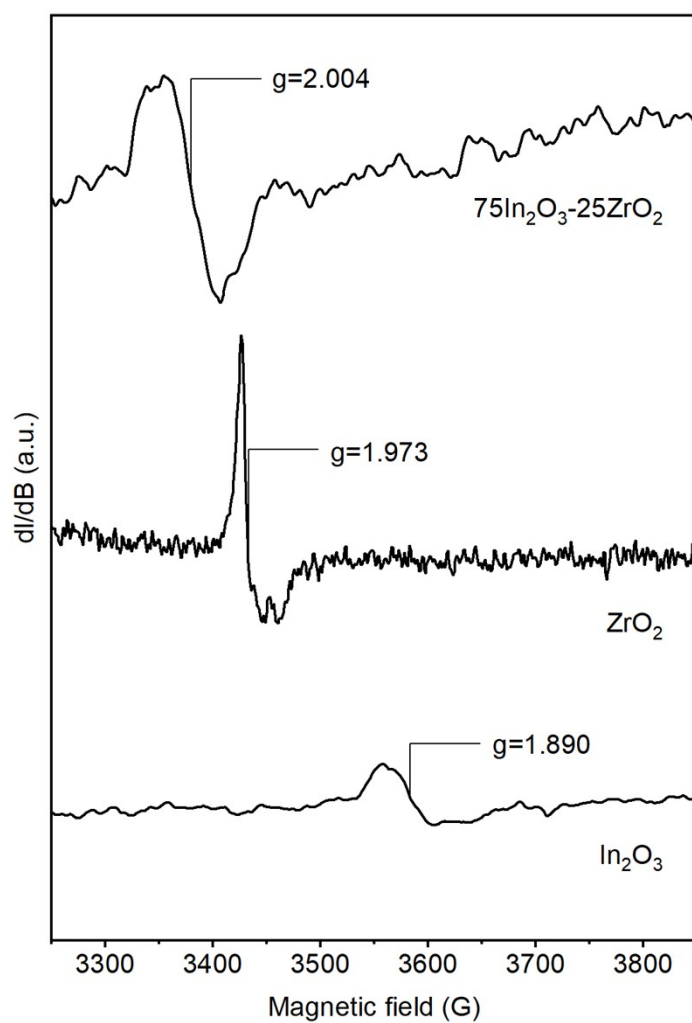

**Figure S6** EPR spectra for 75In<sub>2</sub>O<sub>3</sub>-25ZrO<sub>2</sub>, In<sub>2</sub>O<sub>3</sub> and ZrO<sub>2</sub>.

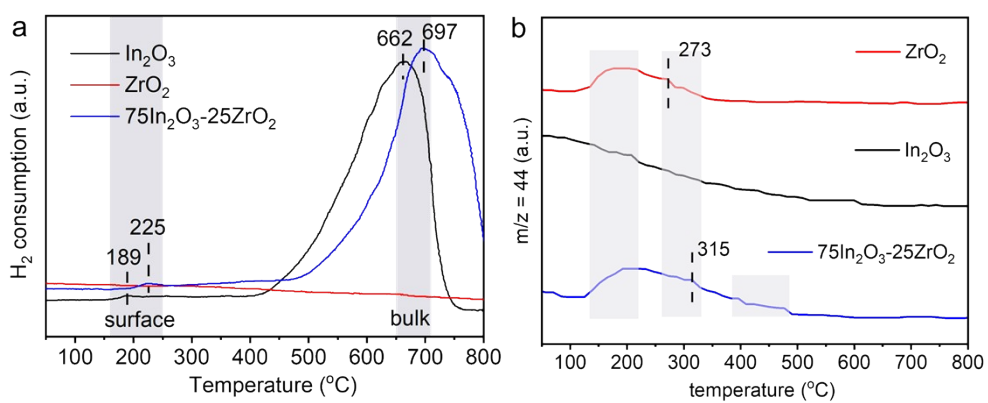

Fig. S7 (a) H<sub>2</sub>-TPR profiles and (b) CO<sub>2</sub>-TPD profiles of  $\text{In}_2\text{O}_3$ ,  $\text{ZrO}_2$  and  $75\text{In}_2\text{O}_3\text{-}25\text{ZrO}_2$  catalyst.

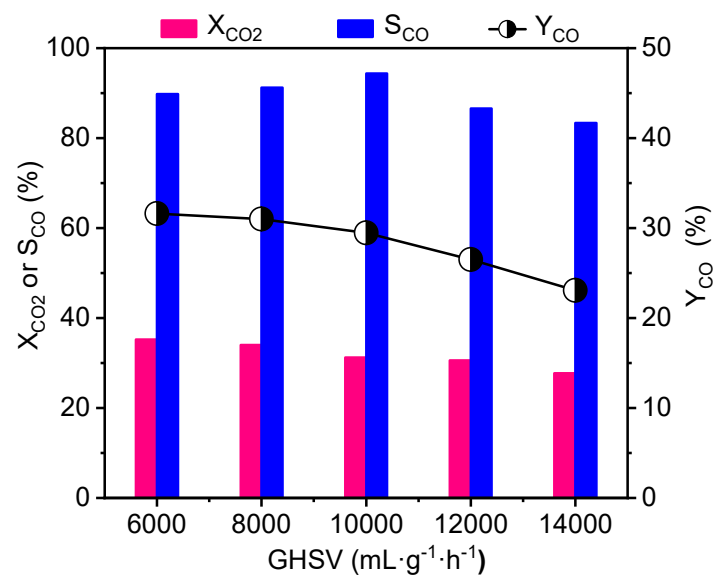

**Figure S8** The influence of GHSV on the catalytic performance of 75In<sub>2</sub>O<sub>3</sub>-25ZrO<sub>2</sub> (reaction conditions: 400 °C, H<sub>2</sub>: CO<sub>2</sub>: Ar ratio = 72: 24: 4, 0.1 MPa).

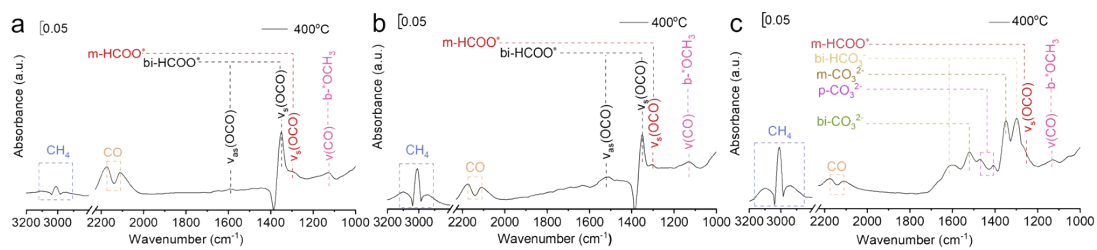

**Figure S9** *In-situ* FTIR spectra of the reaction of CO<sub>2</sub> and H<sub>2</sub> over (a) 75In<sub>2</sub>O<sub>3</sub>-25ZrO<sub>2</sub>, (b) In<sub>2</sub>O<sub>3</sub>, and (c) ZrO<sub>2</sub> (reaction conditions: 400 °C, 0.5MPa).

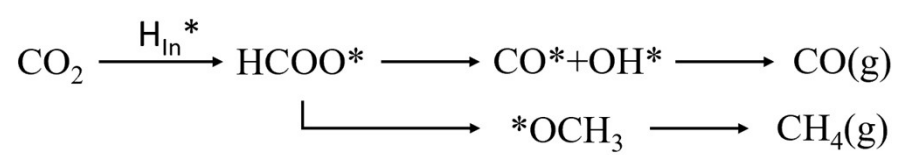

**Scheme S1** Reaction mechanism catalyzed by 75In<sub>2</sub>O<sub>3</sub>-25ZrO<sub>2</sub>.

## Reference

- 1 W. Wang, Y. Zhang, Z. Wang, J.-m. Yan, Q. Ge and C.-J. Liu, *Catal. Today*, 2016, **259**, 402-408.
- 2 M. Li, T.H.M. Pham, Y. Ko, K. Zhao, L. Zhong, W. Luo and A. Zutte, *ACS Sustain. Chem. Eng.*, 2022, **10**, 1524-1535.
- 3 Z. Zhang, Y. Zang, F. Gao, J. Qu, J. Gu and X. Lin, *New J. Chem.*, 2022, **46**, 22332-22340.
- 4 Q. Zhang, L. Pastor-Perez, Q. Wang and T.R. Reina, *J. Energy Chem.*, 2022, **66**, 635-646.
- 5 L. Chen, D. Wu, C. Wang, M. Ji and Z. Wu, *J. Environ. Chem. Eng.*, 2021, **9**, 105183.
- 6 Y. Liu and D.Z. Liu, *Int. J. Hydrog. Energy*, 1999, **24**, 351-354.
- 7 A.I.M. Rabee, D. Zhao, S. Cisneros, C.R. Kreyenschulte, V. Kondratenko, S. Bartling, C. Kubis, E.V. Kondratenko, A. Brueckner and J. Rabeah, *Appl. Catal. B-Environ.*, 2023, **321**, 122083.
- 8 N. Ishito, K. Hara, K. Nakajima and A. Fukuoka, *J. Energy Chem.*, 2016, **25**, 306-310.
- 9 S. Choi, B.-I. Sang, J. Hong, K.J. Yoon, J.-W. Son, J.-H. Lee, B.-K. Kim and H. Kim, *Sci Rep*, 2017, **7**, 41207.
- 10 W. Wang, Z. Qu, L. Song and Q. Fu, *J. Energy Chem.*, 2020, **40**, 22-30.
- 11 S.S. Dang, B. Qin, Y. Yang, H. Wang, J. Cai, Y. Han, S.G. Li, P. Gao and Y.H. Sun, *Sci. Adv.*, 2020, **6**, eaaz2060.
- 12 Y. Wei, F. Liu, J. Ma, C. Yang, X. Wang and J. Cao, *Mol. Catal.*, 2022, **525**,



- 112354.
- 13 L. Lin, S. Yao, Z. Liu, F. Zhang, N. Li, D. Vovchok, A. Martínez-Arias, R. Castañeda, J. Lin, S.D. Senanayake, D. Su, D. Ma and J.A. Rodriguez, *J. Phys. Chem. C*, 2018, **122**, 12934-12943.
  - 14 S. Collins, M. Baltanas and A. Bonivardi, *J. Catal.*, 2004, **226**, 410-421.
  - 15 F. Ouyang, J.N. Kondo, K. Maruya and K. Domen, *Catal. Lett.*, 1998, **50**, 179-181.
  - 16 S. Kattel, B. Yan, Y. Yang, J.G. Chen and P. Liu, *J. Am. Chem. Soc.*, 2016, **138**, 12440-12450.
  - 17 C. Yang, C. Pei, R. Luo, S. Liu, Y. Wang, Z. Wang, Z.-J. Zhao and J. Gong, *J. Am. Chem. Soc.*, 2020, **142**, 19523-19531.
  - 18 T.-y. Chen, C. Cao, T.-b. Chen, X. Ding, H. Huang, L. Shen, X. Cao, M. Zhu, J. Xu, J. Gao and Y.-F. Han, *ACS Catal.*, 2019, **9**, 8785-8797.
  - 19 W. Wang, Z. Qu, L. Song and Q. Fu, *J. Catal.*, 2020, **382**, 129-140.
  - 20 B. Liu, T. Fang and Y. He, *Catal. Sci. Technol.*, 2022, **12**, 300-309.
  - 21 K. Pokrovski, K.T. Jung and A.T. Bell, *Langmuir*, 2001, **17**, 4297-4303.
  - 22 Y. Wang, L. Zhu, Y. Liu, E.I. Vovk, J. Lang, Z. Zhou, P. Gao, S. Li and Y. Yang, *Appl. Surf. Sci.*, 2023, **631**, 157534.
  - 23 L.Z. Gao and C.T. Au, *J. Catal.*, 2000, **189**, 1-15.
  - 24 G.C. Cabilla, A.L. Bonivardi and M.A. Baltanás, *J. Catal.*, 2001, **201**, 213-220.
  - 25 C.Y. Regalado Vera, N. Manavi, Z. Zhou, L.-C. Wang, W. Diao, S. Karakalos, B. Liu, K.J. Stowers, M. Zhou, H. Luo and D. Ding, *Chem. Eng. J.*, 2021, **426**, 131767.
